# Supplementary material for: Confined toluene within InOF-1: CO2capture enhancement
Source: Royal Society of Chemistry journal article supplement (doi:10.1039/c9ra05991a), 2019-01-01
Supplement: c9ra05991a1.pdf [file c9ra05991a1.pdf]

## Electronic Supporting Information

### *Confined toluene within InOF-1: CO<sub>2</sub> capture enhancement*

*L. Pamela Garrido-Olvera,<sup>a</sup> Jonathan E. Sanchez-Bautista,<sup>a</sup> Daniel Alvarado-Alvarado,<sup>a</sup> Bruno Landeros-Rivera,<sup>\*b</sup> J. Raziel Álvarez,<sup>a</sup> Rubicelia Vargas,<sup>\*b</sup> Eduardo González-Zamora,<sup>b</sup> Jorge Balmaseda,<sup>c</sup> Hugo A. Lara-García,<sup>d</sup> Ana Martínez,<sup>c</sup> and Ilich A. Ibarra<sup>\*a</sup>*

<sup>a</sup> Laboratorio de Físicoquímica y Reactividad de Superficies (LaFRoS), Instituto de Investigaciones en Materiales, Universidad Nacional Autónoma de México, Circuito Exterior s/n, CU, Del. Coyoacán, 04510 Ciudad de México, México.

<sup>b</sup> Departamento de Química, Universidad Autónoma Metropolitana-Iztapalapa, San Rafael Atlixco 186, Col. Vicentina, Iztapalapa, C. P. 09340 Ciudad de México, México.

<sup>c</sup> Instituto de Investigaciones en Materiales, Universidad Nacional Autónoma de México, Circuito Exterior s/n, CU, Coyoacán, 04510, Ciudad de México, México.

<sup>d</sup> Instituto de Física, Universidad Nacional Autónoma de México, Circuito de la Investigación científica s/n, CU, Del. Coyoacán, 04510, Ciudad de México, Mexico.

## 1. Powder X-ray diffraction patterns of InOF-1

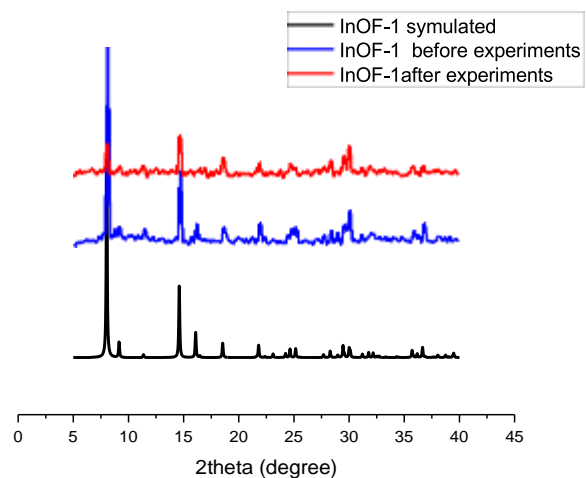

Fig. S1. Powder X-ray diffraction patterns of calculated (black); before experiments, as synthesized (blue); and after-adsorption experiments, without activation (red) InOF-1.

## 2. Adsorption isotherms for toluene

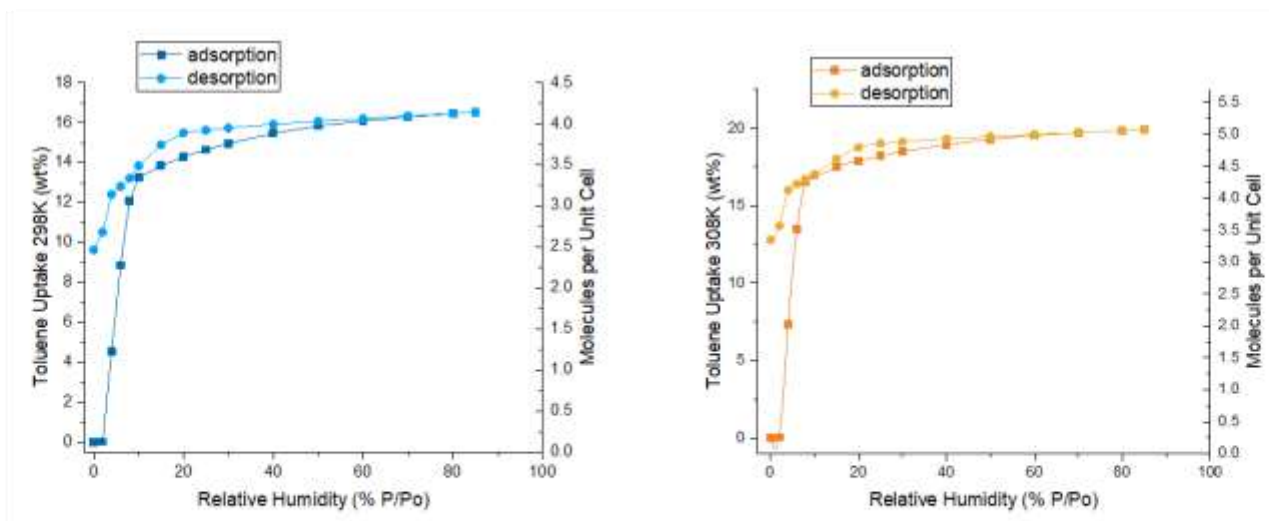

Fig. S2. Toluene adsorption isotherms at 298K (blue) and 308K (orange) for InOF-1 from  $P/P_0 = 0$  to 85. Squares show adsorption phase, while circles show desorption phase

### 3. Derivation of the isosteric enthalpy of adsorption for toluene

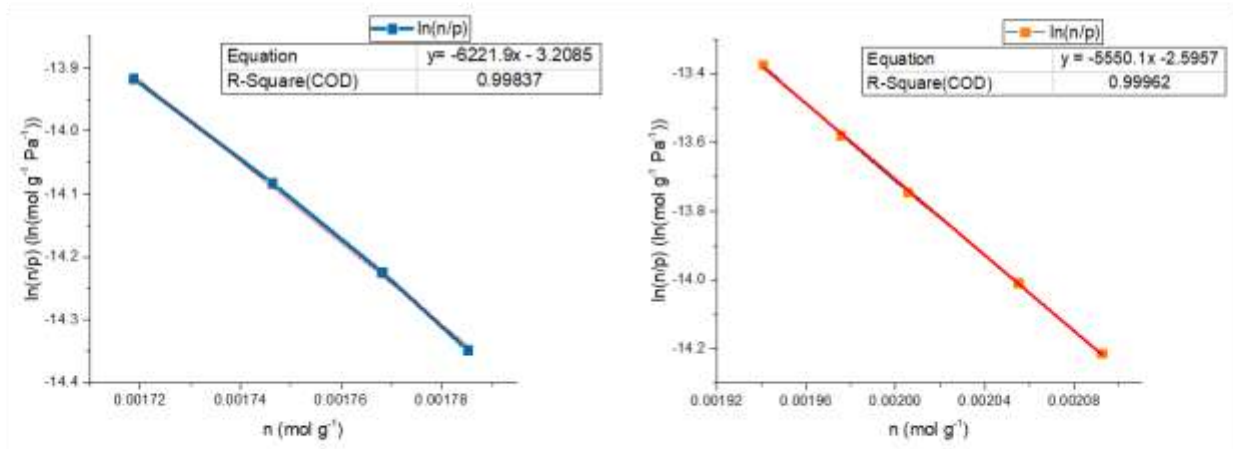

Fig. S3. Virial fitting plot for the adsorption of toluene on InOF-1 at 298 K (left) and 308 K (right)

The isosteric heat of adsorption ( $\Delta H_{\text{ads}}$ ) was calculated with the help of toluene adsorption isotherms using the isosteric method,  $Q_{\text{\#}}$ , by fitting a virial-type equation to both 298 and 308 K toluene adsorption isotherms. The following virial-type equation was used to fit both isotherms:

$$\ln\left(\frac{n}{p}\right) = A_0 + A_1 n + A_2 n^2 \dots$$

Where  $p$  is the pressure,  $n$  is the amount absorbed by the material InOF-1, and  $A_0, A_1$ , etc. are the virial coefficients,  $A_0$  and higher terms can be ignored.

A plot of  $\ln\left(\frac{n}{p}\right)$  versus  $n$  should give a straight line at low surface coverage. Once obtained the plots,  $Q_{\text{\#}}$  was calculated with the help of the Clausius-Clapeyron equation, obtaining a value of 46.81 kJ mol<sup>-1</sup>:

$$Q_{\text{\#}} = R \ln \left( \frac{p_2}{p_1} \right) \frac{1}{\frac{1}{T_2} - \frac{1}{T_1}}$$

#### 4. Theoretical calculations

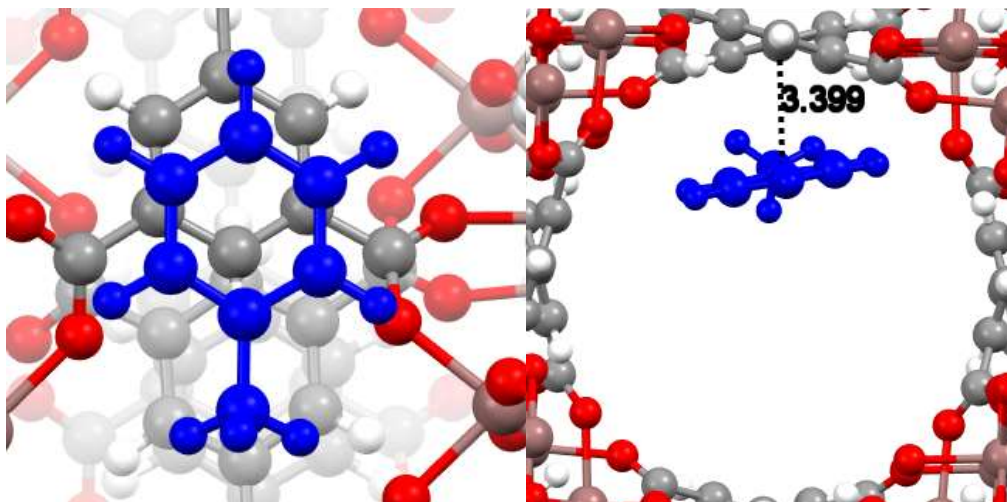

Fig. S4. Pore channel (*top*) and close up (*bottom*) views of an additional optimized structure of the toluene molecule (shown in blue) adsorbed within InOF-1 in a parallel displaced geometry. Pink, red, grey and white colors represent indium, oxygen, carbon and hydrogen atoms, correspondingly. Intermolecular distances are depicted in black (Å).

Table S1. Electron density ( $\rho_{@}$ ), its laplacian ( $\nabla^0\rho_{@}$ ), the kinetic and potential energy densities ratio  $|V_{@}/G_{@}|$  and the electron energy density ( $H_{@}$ ) values evaluated at the bond critical points for each contact found in the toluene@InOF-1 system. All values (a.u.) are indicative of non-covalent interactions. The strongest H...H interaction is highlighted in black.

| Interaction  | $\rho_{@}$    | $\nabla^0\rho_{@}$ | $ V_{@}/G_{@} $ | $H_{@}$       |
|--------------|---------------|--------------------|-----------------|---------------|
| C...C        | 0.0075        | 0.0271             | 0.7             | 0.0014        |
| C...C        | 0.0076        | 0.0271             | 0.7             | 0.0014        |
| C...C        | 0.0076        | 0.0285             | 0.7             | 0.0015        |
| C...O        | 0.0080        | 0.0286             | 0.7             | 0.0015        |
| H...H        | 0.0089        | 0.0294             | 0.8             | 0.0013        |
| H...H        | 0.0080        | 0.0278             | 0.7             | 0.0014        |
| <b>H...H</b> | <b>0.0152</b> | <b>0.0491</b>      | <b>0.9</b>      | <b>0.0014</b> |
| C-H...O      | 0.0083        | 0.0297             | 0.7             | 0.0014        |
| C-H...O      | 0.0071        | 0.0241             | 0.7             | 0.0014        |
| C-H...O      | 0.0017        | 0.0064             | 0.7             | 0.0015        |
